# Supplementary material for: Obesity-Activated Lung Stromal Cells Promote Myeloid Lineage Cell Accumulation and Breast Cancer Metastasis
Source: MDPI journal article supplement (doi:10.3390/cancers13051005), 2021-02-28
Supplement: s1 [file s1]

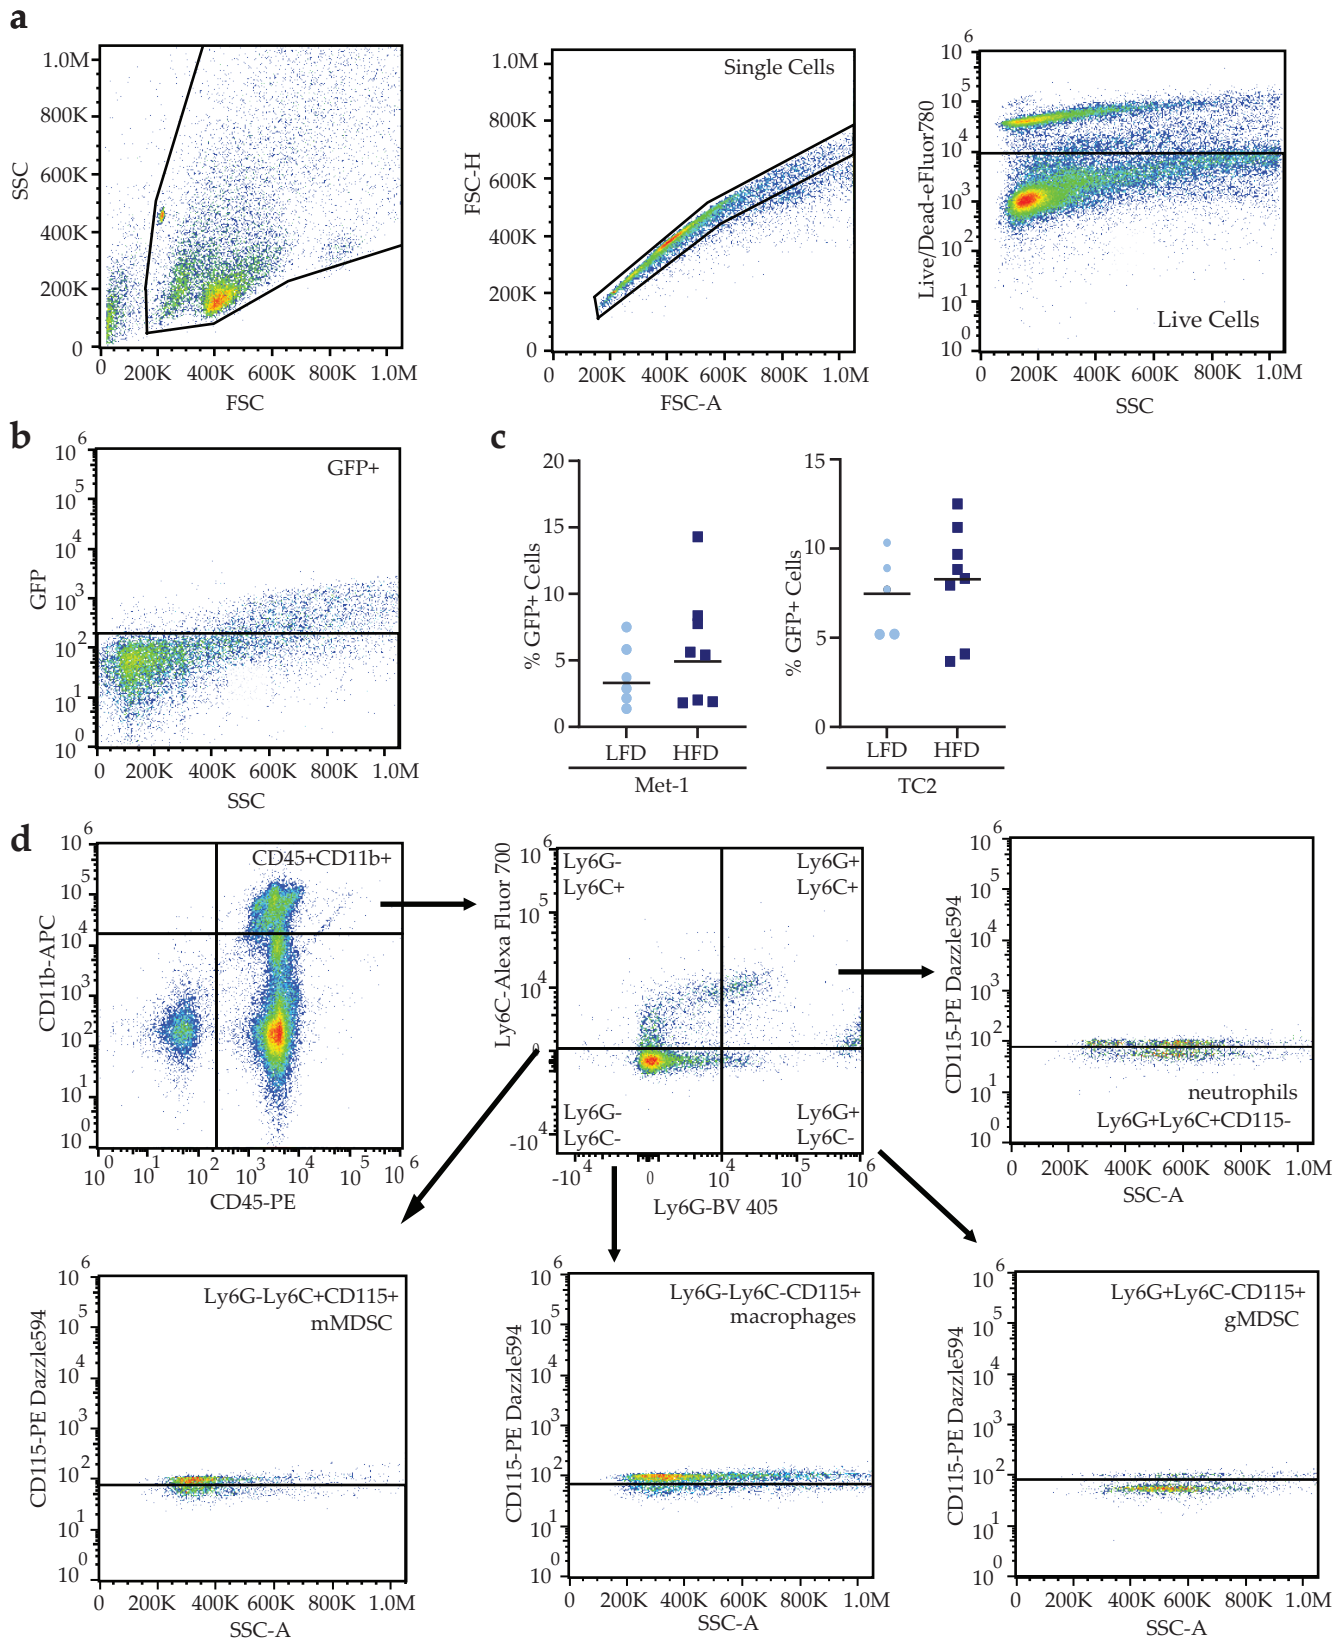

**Figure S2.** Flow cytometry gating strategy of non-tumor bearing and metastatic lungs. **(a)** Debris was gated out using SSC and FCS. Doublets were gated out using FSC-A and FSC-H, and live cells were negative for viability dye eFluor 780. **(b)** GFP+ cells were identified in metastatic lungs. **(c)** Percent of GFP+ Live Cells in metastatic lungs. **(d)** PE-conjugated CD45 and APC-conjugated CD11b were plotted to identify CD45+CD11b+ myeloid lineage cells. CD45+CD11b+ cells were gated to determine Ly6G+/-Ly6C+/- populations. Each population was plotted with CD115-PE/Dazzle 594 and SSC-A to identify Ly6G+Ly6C+CD115- neutrophils, Ly6G-Ly6C+CD115+ mMDSC, Ly6G-Ly6C-CD115+ macrophages, and Ly6G+Ly6C-CD115+ gMDSC.
