# Supplementary material for: Obesity-Activated Lung Stromal Cells Promote Myeloid Lineage Cell Accumulation and Breast Cancer Metastasis
Source: MDPI journal article supplement (doi:10.3390/cancers13051005), 2021-02-28
Supplement: s1 [file s1]

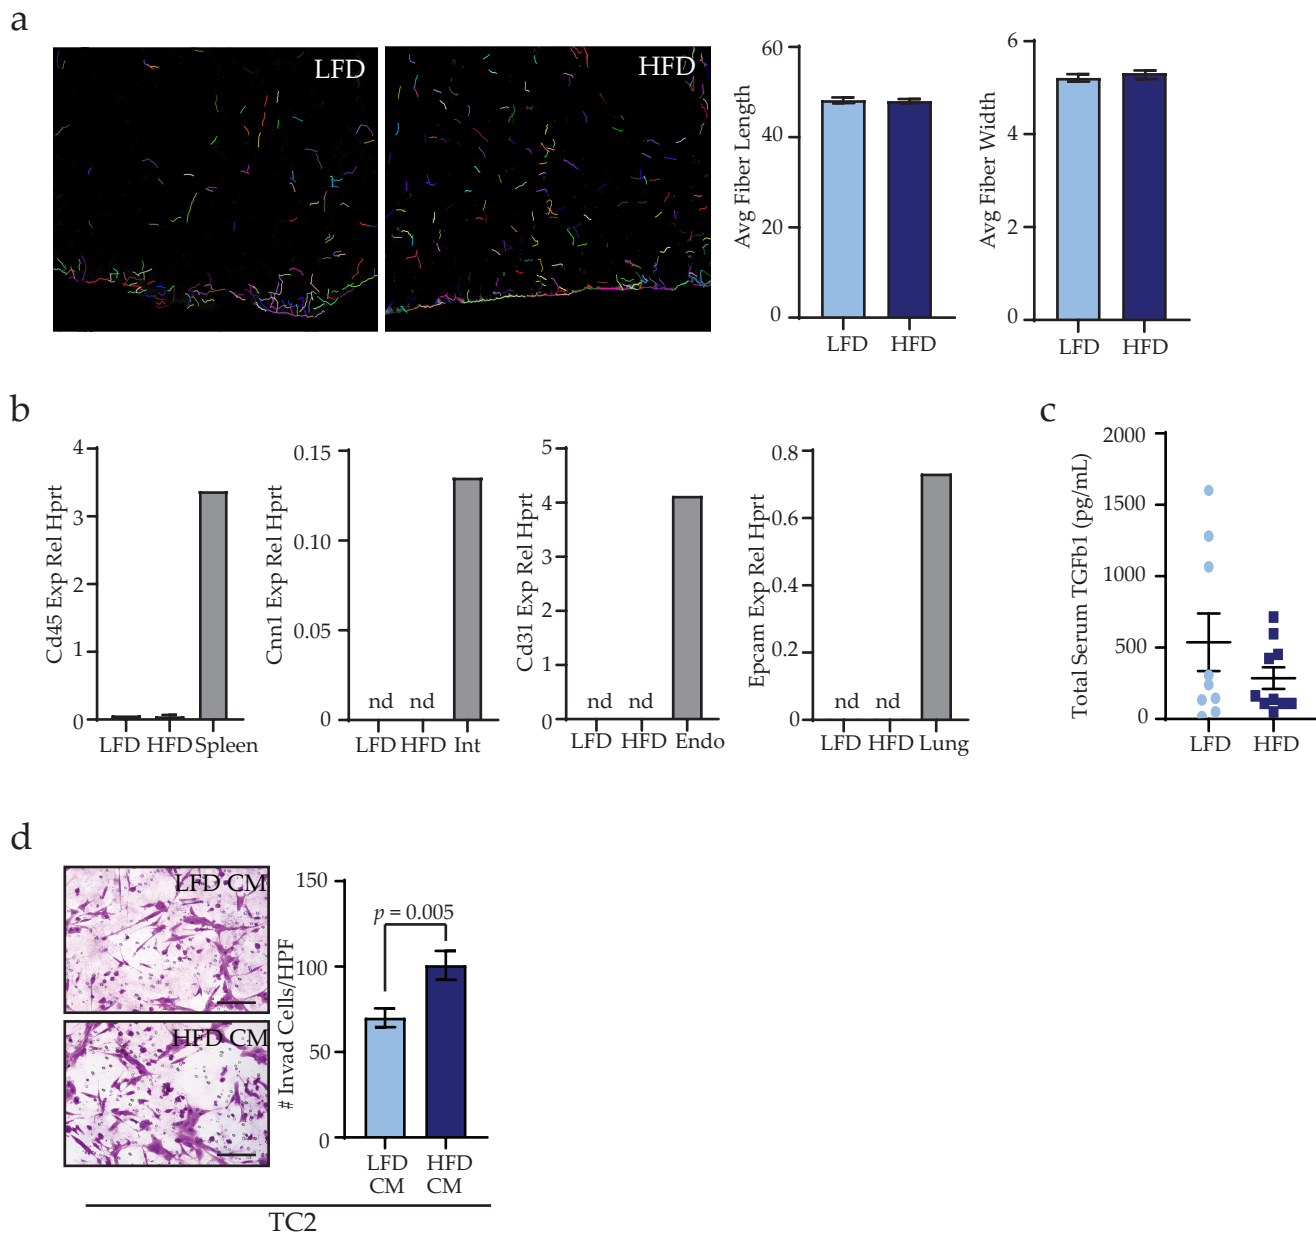

**Figure S4.** Characterization of lung stromal cells from LFD or HFD-fed mice. **(a)** Quantification of collagen length and width using CT-FIRE in picrosirius red-stained sections of lungs from non-tumor-bearing LFD and HFD-fed mice (n=5 mice/group). **(b)** Expression of markers for immune cells (*Cd45*), endothelial cells (*Cd31*), pericytes (*Cnn1* and *Cd31*), and epithelial cells (*Epcam*) from lung stromal cells isolated from LFD or HFD-fed mice. Positive controls included spleen, intestines (int), primary mouse endothelial cells (endo), and whole lung tissue. Represented as relative expression compared to *Hprt* (n=3 mice/group). **(c)** Concentration of total TGFβ1 protein in serum from LFD and HFD-fed mice (n=9-10 mice/group). **(d)** Quantification of TC2 cells in high-power fields (HPF) invading toward conditioned media from lung stromal cells (n=5 mice/group). Magnification bars = 50μm.
