# Supplementary material for: Obesity-Activated Lung Stromal Cells Promote Myeloid Lineage Cell Accumulation and Breast Cancer Metastasis
Source: MDPI journal article supplement (doi:10.3390/cancers13051005), 2021-02-28
Supplement: s1 [file s1]

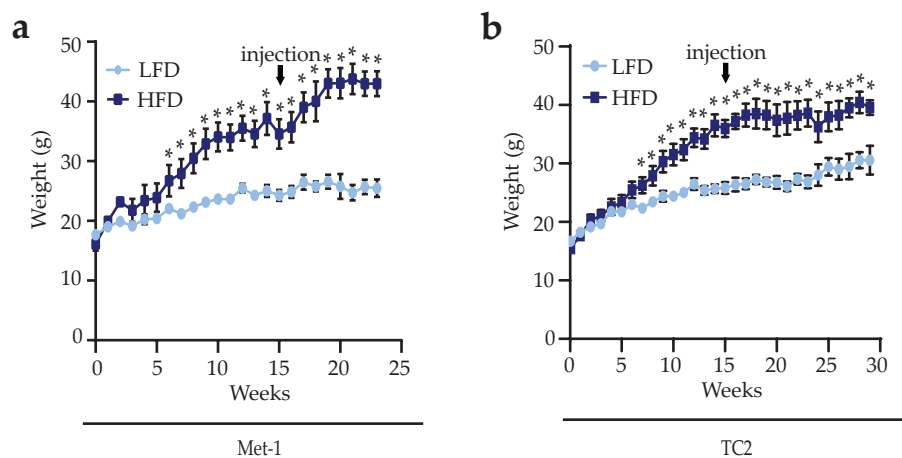

**Figure S1.** Weight gain of mice following tumor cell transplants. Weight gain of female mice fed either the low-fat (LFD) or high-fat diet (HFD). Mice received tumor cell injections (arrow) of either Met-1 tumor cells (n=4 mice/group) (**a**) or TC2 tumor cells (n=4 mice/group) (**b**) into their inguinal mammary glands after being fed their respective diets for 16 weeks. \* $p < 0.05$
