# Supplementary material for: Obesity-Activated Lung Stromal Cells Promote Myeloid Lineage Cell Accumulation and Breast Cancer Metastasis
Source: MDPI journal article supplement (doi:10.3390/cancers13051005), 2021-02-28
Supplement: s1 [file s1]

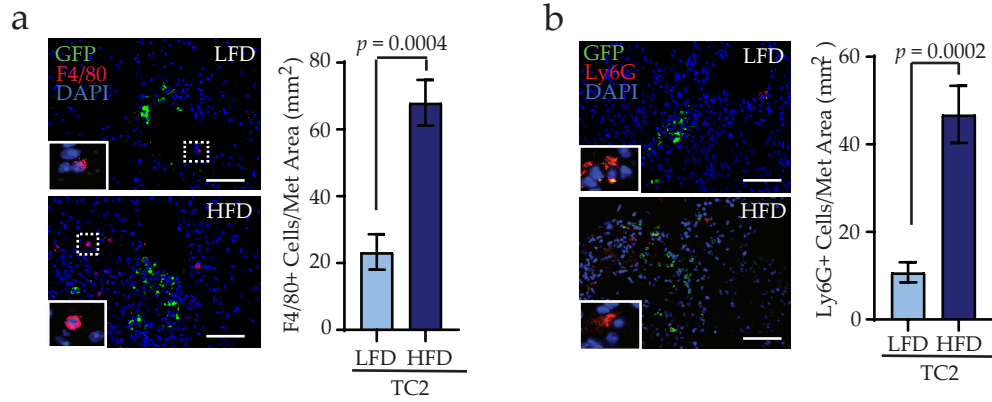

**Figure S3.** Immune cell recruitment surrounding TC2 tumor cell metastases. **(a)** Quantification of F4/80+ macrophages surrounding lung metastases (n=5 mice/group). **(b)** Quantification of Ly6G+ neutrophils and gMDSC surrounding lung metastases. Magnification bars = 50 $\mu$ m.
